# Supplementary material
Source: publisher site journal article supplement (https://www.dovepress.com/article/284032)
Supplement: Supplementary file 1 [file get_supplementary_file.php]

Table S1. The sequences of plasmids used in the luciferase reporter assays

| Plasmids                | Sequences                                                                                                                                                                                                                                                                                                                                                                                                                                                                                     |
|-------------------------|-----------------------------------------------------------------------------------------------------------------------------------------------------------------------------------------------------------------------------------------------------------------------------------------------------------------------------------------------------------------------------------------------------------------------------------------------------------------------------------------------|
| pEZX-MT06-Wt-circ_GLG1  | GAAGCAAATAAAAAACAGTGAATTGATGGATCCCAAATGCAAACAGATGATAACCAAGCGCC<br>AGATCACCCAGAACACAGATTACCGCTTAAACCCCATGTTAAGAAAAGCCTGTAAAGCTGACA<br>TTCCTAAATTCTGTCACGGTATCCTGACTAAGGCCAAGGATGATTCAGAATTAGAAGGACAAG<br>TCATCTCTTGCCTGAAGCTGAGATATGCTGACCAGCGCCTGTCTT <b>CAGACTGTGAAGACCAGA</b><br>TCCGAATCATTATCCAGGAGTCCGCCCTGGACTACCGCCTGGATCCTCAGCTCCAGCTGCACT<br>GCTCAGACGAGATCTCCAGTCTATGTGCTGAAGAAGCAGCAGCCCAAGAGCAGACAGGTCAG<br>GTGGAGGAGTGCCTCAAGGTCAACCTGCTCAAGATCAAAACAGAATTGTGTAAAAAG             |
| pEZX-MT06-Mut-circ_GLG1 | GAAGCAAATAAAAAACAGTGAATTGATGGATCCCAAATGCAAACAGATGATAACCAAGCGCC<br>AGATCACCCAGAACACAGATTACCGCTTAAACCCCATGTTAAGAAAAGCCTGTAAAGCTGACA<br>TTCCTAAATTCTGTCACGGTATCCTGACTAAGGCCAAGGATGATTCAGAATTAGAAGGACAAG<br>TCATCTCTTGCCTGAAGCTGAGATATGCTGACCAGCGCCTGTCTT <b>GTCTGACTGAAGACCAGA</b><br>TCCGAATCATTATCCAGGAGTCCGCCCTGGACTACCGCCTGGATCCTCAGCTCCAGCTGCACT<br>GCTCAGACGAGATCTCCAGTCTATGTGCTGAAGAAGCAGCAGCCCAAGAGCAGACAGGTCAG<br>GTGGAGGAGTGCCTCAAGGTCAACCTGCTCAAGATCAAAACAGAATTGTGTAAAAAG             |
| pEZX-MT06-Wt-KRAS       | TCTGGGTGTTGATGATGCCTTCTATACATTAGTTCGAGAAATTCGAAAACATAAAGAAAAGATG<br>AGCAAAGATGGTAAAAAGAAGAAAAAGAAGTCAAAGACAAAGTGTGTAATTATGTAAATACA<br>ATTTGTACTTTTTTCTTAAGGCATACTAGTACAAGTGGTAATTTTTGTACATTACCTAAATTATT<br>AGCATTGTGTTTAGCATTACCTAATTTTTTCTGCTCCAT <b>GCAGACTGTTAGCTTTTACCTTAA</b><br>ATGCTTATTTTAAAATGACAGTGGAAGTTTTTTTTTCTCTAAGTGCCAGTATTCCCAGAGTTTT<br>GGTTTTTGAAGTAGCAATGCCTGTGAAAAAGAACTGAATACCTAAGATTTCTGTCTTGGGGC<br>TTTTGGTGCATGCAGTTGATTACTTCTATTTTTTCTTACCAATTGTGAATGTTGGTGTGAAACAA |
| pEZX-MT06-Mut-KRAS      | TCTGGGTGTTGATGATGCCTTCTATACATTAGTTCGAGAAATTCGAAAACATAAAGAAAAGATG<br>AGCAAAGATGGTAAAAAGAAGAAAAAGAAGTCAAAGACAAAGTGTGTAATTATGTAAATACA<br>ATTTGTACTTTTTTCTTAAGGCATACTAGTACAAGTGGTAATTTTTGTACATTACCTAAATTATT<br>AGCATTGTGTTTAGCATTACCTAATTTTTTCTGCTCCAT <b>CGTCTGACTTAGCTTTTACCTTAA</b><br>TGCTTATTTTAAAATGACAGTGGAAGTTTTTTTTTCTCTAAGTGCCAGTATTCCCAGAGTTTTG<br>GTTTTTGAAGTAGCAATGCCTGTGAAAAAGAACTGAATACCTAAGATTTCTGTCTTGGGGC<br>TTTTGGTGCATGCAGTTGATTACTTCTATTTTTTCTTACCAATTGTGAATGTTGGTGTGAAACAA  |

gray area, miR-622-binding sites

Table S2. Relationships between circ\_GLG1 expression and clinico-pathological characteristics in 40 patients with colorectal cancer

| Factor          | Cases | circ_GLG1      |                 |         |
|-----------------|-------|----------------|-----------------|---------|
|                 |       | Low expression | High expression | P value |
| Age (years)     |       |                |                 |         |
| ≥ 60            | 24    | 13             | 11              | 0.301   |
| < 60            | 16    | 6              | 10              |         |
| Sex             |       |                |                 |         |
| Male            | 24    | 12             | 12              | 0.698   |
| Female          | 16    | 7              | 9               |         |
| Cancer type     |       |                |                 |         |
| Colon cancer    | 19    | 6              | 13              | 0.055   |
| Rectal cancer   | 21    | 13             | 8               |         |
| Differentiation |       |                |                 |         |
| Poor            | 8     | 2              | 6               | 0.303   |
| Well & moderate | 32    | 17             | 15              |         |
| Invasion        |       |                |                 |         |
| T1 & T2         | 5     | 4              | 1               | 0.172   |
| T3 & T4         | 35    | 15             | 20              |         |
| Stage           |       |                |                 |         |
| I & II          | 18    | 10             | 8               | 0.356   |
| III             | 22    | 9              | 13              |         |
| Nodal status    |       |                |                 |         |
| Negative        | 18    | 10             | 8               | 0.356   |
| Positive        | 22    | 9              | 13              |         |

Table S3. TargetScan miRNA predictions

| CircRNA Mirbase ID           | CircRNA (Top) - miRNA (Bottom) pairing | Site Type | CircRNA Start | CircRNA End | Position | Context + Score | Context + Score Percentile |
|------------------------------|----------------------------------------|-----------|---------------|-------------|----------|-----------------|----------------------------|
| hsa_circ_0003315 (5' ... 3') | UUGAAGCAAAAUAAAAACAGUGA<br>            | 8mer-1a   | 58            | 65          | -0.1     | -0.366          | 99                         |
| hsa-miR-1208 (3' ... 5')     | AGGCGGACAGACUUGUCACU                   |           |               |             |          |                 |                            |
| hsa_circ_0003315 (5' ... 3') | GUCAGGUGGAGGAGUGCCUCAAG<br>            | 7mer-m8   | 431           | 437         | -0.056   | -0.158          | 92                         |
| hsa-miR-1304 (3' ... 5')     | GUGUAGAGUGACAUCGGAGUUU                 |           |               |             |          |                 |                            |
| hsa_circ_0003315 (5' ... 3') | AACAGUGAAUUGAUGGAUCCCAA<br>            | 8mer-1a   | 73            | 80          | -0.096   | -0.427          | 99                         |
| hsa-miR-769-3p (3' ... 5')   | UUGGUUCUGGGGCCUCUAGGGUC                |           |               |             |          |                 |                            |
| hsa_circ_0003315 (5' ... 3') | AAACCAUGUUGCAGUGCUUGAAG<br>            | 7mer-m8   | 41            | 47          | -0.056   | -0.153          | 97                         |
| hsa-miR-498 (3' ... 5')      | CUUUUUGCGGGGGACCGAACUUU                |           |               |             |          |                 |                            |
| hsa_circ_0003315 (5' ... 3') | CUCAAGGUCAACCUGCUCAAGAU<br>            | 7mer-m8   | 448           | 454         | -0.058   | -0.144          | 92                         |
| hsa-miR-526b (3' ... 5')     | UGUCUUUCACGAAGGGAGUUCUC                |           |               |             |          |                 |                            |
| hsa_circ_0003315 (5' ... 3') | CAAGGAUGAUUCAGAAUUAGAAG<br>            | 7mer-m8   | 219           | 225         | -0.031   | -0.02           | 91                         |
| hsa-miR-576-5p (3' ... 5')   | UUUCUGCACCUCUUUAAUCUUA                 |           |               |             |          |                 |                            |
| hsa_circ_0003315 (5' ... 3') | ACCAGCGCCUGUCUUCAGACUGU<br>            | 7mer-m8   | 278           | 284         | -0.034   | -0.188          | 94                         |
| hsa-miR-622 (3' ... 5')      | CGAGGUUGGAGUCGUCUGACA                  |           |               |             |          |                 |                            |
| hsa_circ_0003315 (5' ... 3') | ACACAGAUUACCGCUUAAACCCC<br>            | 7mer-m8   | 134           | 140         | -0.043   | -0.157          | 96                         |
| hsa-miR-629 (3' ... 5')      | UCAAGAGGGUUGCAUUUGGGU                  |           |               |             |          |                 |                            |

Table S3. Continued

| CircRNA Mirbase ID           | CircRNA (Top) - miRNA (Bottom) pairing | Site Type | CircRNA Start | CircRNA End | Position | Context + Score | Context + Score Percentile |
|------------------------------|----------------------------------------|-----------|---------------|-------------|----------|-----------------|----------------------------|
| hsa_circ_0003315 (5' ... 3') | GCUGAAGAAGCAGCAGCCCAAGA<br>            | 8mer-1a   | 400           | 407         | -0.096   | -0.38           | 97                         |
| hsa-miR-635 (3' ... 5')      | CCUGUAACAAAGUCACGGGUUCA                |           |               |             |          |                 |                            |
| hsa_circ_0003315 (5' ... 3') | AACAGUGAAUUGAUGGAUCCCAA<br>            | 7mer-1a   | 73            | 79          | -0.042   | -0.233          | 96                         |
| hsa-miR-638 (3' ... 5')      | CGGCGGUGGGCGGGCGCUAGGGA                |           |               |             |          |                 |                            |
| hsa_circ_0003315 (5' ... 3') | CUGUAAAGCUGACAUCCUAAAU<br>             | 7mer-1a   | 171           | 177         | -0.031   | -0.095          | 91                         |
| hsa-miR-651 (3' ... 5')      | UUUCAGUUCGAAU   AGGAUUU                |           |               |             |          |                 |                            |
| hsa_circ_0003315 (5' ... 3') | GAGUGCCUCAAGGUCAACCUGCU<br>            | 7mer-m8   | 442           | 448         | -0.058   | -0.203          | 93                         |
| hsa-miR-657 (3' ... 5')      | GGAUCUCUCCACUCUUGGACGG                 |           |               |             |          |                 |                            |
